# Supplementary material for: Cost-Effectiveness of Insulin Degludec vs. Insulin Glargine U100 in Type 1 and Type 2 Diabetes Mellitus in a UK Setting
Source: PubMed Central journal article supplement — Diabetes Ther. 2018 Aug 10;9(5):1919–30. doi: 10.1007/s13300-018-0478-1 (PMC6167291; doi:10.1007/s13300-018-0478-1), 2018-08-10
Supplement: 13300_2018_478_MOESM1_ESM.pdf [file 13300_2018_478_MOESM1_ESM.pdf]

## Supplementary Appendix

**Supplementary Table S1. Inputs for probabilistic sensitivity analysis**

|                                  | Type 1 diabetes mellitus<br>(basal–bolus insulin) |                 |              | Type 2 diabetes mellitus<br>(basal-only insulin) |                 |              |
|----------------------------------|---------------------------------------------------|-----------------|--------------|--------------------------------------------------|-----------------|--------------|
| <b>Hypoglycaemia rate-ratios</b> | Rate ratio                                        | SE of log ratio | Distribution | Rate ratio                                       | SE of log ratio | Distribution |
| Daytime                          | 0.98                                              | 0.0215          | Lognormal    | 0.80                                             | 0.0580          | Lognormal    |
| Nocturnal                        | 0.76                                              | 0.0514          | Lognormal    | 0.76                                             | 0.0846          | Lognormal    |
| Severe                           | 0.74                                              | 0.1016          | Lognormal    | 0.49                                             | 0.3287          | Lognormal    |
| <b>Glargine U100 dose</b>        | Mean                                              | SE              | Distribution | Mean                                             | SE              | Distribution |
| Basal                            | 40.58                                             | 2.4875          | Normal       | 82.66                                            | 2.9675          | Normal       |
| Bolus                            | 31.93                                             | 2.0515          | Normal       | N/A                                              |                 |              |
| <b>Dose ratios</b>               | Ratio                                             | SE of log ratio | Distribution | Ratio                                            | SE of log ratio | Distribution |
| Basal                            | 0.97                                              | 0.0126          | Lognormal    | 0.96                                             | 0.0106          | Lognormal    |
| Bolus                            | 0.97                                              | 0.0190          | Lognormal    | N/A                                              |                 |              |
| <b>Hypoglycaemia disutility</b>  | Disutility value                                  | SE              | Distribution | Disutility value                                 | SE              | Distribution |
| Daytime                          | 0.0054                                            | 0.0007          | Normal       | 0.0054                                           | 0.0007          | Normal       |
| Nocturnal                        | 0.0077                                            | 0.0009          | Normal       | 0.0077                                           | 0.0009          | Normal       |
| Severe                           | 0.0623                                            | 0.0043          | Normal       | 0.0623                                           | 0.0043          | Normal       |

Glar U100, insulin glargine 100 units/mL; SE, standard error

**Supplementary Table S2. One-way sensitivity analysis: Type 1 diabetes mellitus**

|                                                                                                   | <b>ΔCosts<br/>Degludec–<br/>glargine U100 (£)</b> | <b>ΔQALYs<br/>Degludec–<br/>glargine<br/>U100</b> | <b>ICER<br/>(£/QALY)<br/>Degludec vs.<br/>glargine<br/>U100</b> |
|---------------------------------------------------------------------------------------------------|---------------------------------------------------|---------------------------------------------------|-----------------------------------------------------------------|
| Base case                                                                                         | <b>23</b>                                         | <b>0.0232</b>                                     | <b>984</b>                                                      |
| <b>Baseline hypoglycaemia rates</b>                                                               |                                                   |                                                   |                                                                 |
| UKHSG (T1DM using insulin >15 years) <sup>1</sup> : non-severe: 29, severe: 3.2                   | -77                                               | 0.0603                                            | Dominant                                                        |
| Donnelly 2005 <sup>2</sup> : non-severe: 41.74, severe: 1.15                                      | 16                                                | 0.0314                                            | 495                                                             |
| Dornhorst 2007 <sup>3</sup> : non-severe: 44.1, severe: 3                                         | -70                                               | 0.0618                                            | Dominant                                                        |
| Östenson 2014 <sup>4</sup> : non-severe: 91 (22% nocturnal), severe: 0.7                          | 27                                                | 0.0485                                            | 548                                                             |
| <b>Degludec/glargine U100 hypoglycaemia rate ratios</b>                                           |                                                   |                                                   |                                                                 |
| Inclusion of non-significant rate ratios                                                          | 22                                                | 0.0247                                            | 898                                                             |
| Maintenance rate ratios                                                                           | 5                                                 | 0.0322                                            | 145                                                             |
| Maintenance rate ratios, incl. non-significant                                                    | 3                                                 | 0.0365                                            | 76                                                              |
| <b>Non-severe hypoglycaemia healthcare costs</b>                                                  |                                                   |                                                   |                                                                 |
| Base case values –20%                                                                             | 23                                                | 0.0232                                            | 1006                                                            |
| Base case values +20%                                                                             | 22                                                | 0.0232                                            | 962                                                             |
| <b>Severe hypoglycaemia healthcare costs</b>                                                      |                                                   |                                                   |                                                                 |
| Base case values –20%                                                                             | 32                                                | 0.0232                                            | 1398                                                            |
| Base case values +20%                                                                             | 13                                                | 0.0232                                            | 570                                                             |
| Waugh 2010 <sup>5</sup> : inflation adjusted                                                      | 44                                                | 0.0232                                            | 1897                                                            |
| No severe hypo costs                                                                              | 71                                                | 0.0232                                            | 3055                                                            |
| <b>Insulin doses</b>                                                                              |                                                   |                                                   |                                                                 |
| Non-significant rate ratios                                                                       | 16                                                | 0.0232                                            | 676                                                             |
| No dose differences                                                                               | 37                                                | 0.0232                                            | 1579                                                            |
| WHO DDD <sup>6</sup> (40 IU basal and 40 IU bolus in both arms)                                   | 35                                                | 0.0232                                            | 1525                                                            |
| <b>Needles per day</b>                                                                            |                                                   |                                                   |                                                                 |
| IGlar U100 two needles per day                                                                    | -13                                               | 0.0232                                            | Dominant                                                        |
| <b>SMBG tests per week</b>                                                                        |                                                   |                                                   |                                                                 |
| 1 less SMBG test per week with degludec                                                           | 5                                                 | 0.0232                                            | 195                                                             |
| 2 fewer SMBG tests per week with degludec                                                         | -14                                               | 0.0232                                            | Dominant                                                        |
| 3 fewer SMBG tests per week with degludec                                                         | -32                                               | 0.0232                                            | Dominant                                                        |
| <b>Hypoglycaemic event disutilities</b>                                                           |                                                   |                                                   |                                                                 |
| Evans 2013 <sup>7</sup> (all five countries): non-severe day/night: 0.0041/0.0067, severe: 0.0565 | 23                                                | 0.0208                                            | 1097                                                            |
| Lauridsen 2014 <sup>8</sup> : diminishing marginal utility approach                               | 23                                                | 0.0197                                            | 1161                                                            |
| <b>Dosing flexibility utility<sup>a</sup> (not included in base case)</b>                         |                                                   |                                                   |                                                                 |
| Boye 2011 <sup>9</sup> : 0.006                                                                    | 23                                                | 0.0292                                            | 782                                                             |
| Evans 2013 <sup>10</sup> : 0.016                                                                  | 23                                                | 0.0392                                            | 582                                                             |

| <b>Work loss costs arising from hypoglycaemia</b>                                                                            |        |        |          |
|------------------------------------------------------------------------------------------------------------------------------|--------|--------|----------|
| Inclusion of work loss costs: Adapted from Brod 2011 <sup>11</sup><br>Reviriego 2008 <sup>12</sup> . £37.65, £64.40, £132.08 | -66.53 | 0.0232 | Dominant |

<sup>a</sup>Able to administer dose at any time of the day; Dominant, improved quality of life at lower cost

ICER, incremental cost-effectiveness ratio; IU, insulin units; glargine U100, insulin glargine 100 units/mL; SMBG, self-measured blood glucose; T1DM, type 1 diabetes mellitus; QALY, quality-adjusted life-year.

**Supplementary Table S3. One-way sensitivity analysis: Type 2 diabetes mellitus**

|                                                                                                   | <b>ΔCosts<br/>Degludec–<br/>glargine U100<br/>(£)</b> | <b>ΔQALYs<br/>Degludec–<br/>glargine U100</b> | <b>ICER<br/>(£/QALY)<br/>Degludec vs.<br/>glargine<br/>U100</b> |
|---------------------------------------------------------------------------------------------------|-------------------------------------------------------|-----------------------------------------------|-----------------------------------------------------------------|
| Base case                                                                                         | <b>117</b>                                            | <b>0.0065</b>                                 | <b>17939</b>                                                    |
| <b>Baseline hypoglycaemia rates</b>                                                               |                                                       |                                               |                                                                 |
| UKHSG (T2DM insulin <2 years) <sup>1</sup> : non-severe: 4.08, severe: 0.1                        | 115                                                   | 0.0086                                        | 13274                                                           |
| UKHSG (T2DM insulin >5 years) <sup>1</sup> : non-severe: 10.2, severe: 0.7                        | -21                                                   | 0.0359                                        | Dominant                                                        |
| Donnelly 2005 <sup>2</sup> : non-severe: 16.02, severe: 0.35                                      | 49                                                    | 0.0326                                        | 1518                                                            |
| Dornhorst 2007 <sup>3</sup> : non-severe: 8.3, severe: 0.8                                        | -41                                                   | 0.0365                                        | Dominant                                                        |
| Östenson 2014 <sup>4</sup> : non-severe: 20.3 (32% nocturnal), severe: 0.1                        | 100                                                   | 0.0303                                        | 3300                                                            |
| <b>Degludec/glargine U100 hypoglycaemia rate ratios</b>                                           |                                                       |                                               |                                                                 |
| Include non-significant rate ratios                                                               | 117                                                   | 0.0065                                        | 17939                                                           |
| Maintenance rate ratios                                                                           | 137                                                   | 0.0050                                        | 27467                                                           |
| Maintenance rate ratios, incl. non-significant                                                    | 118                                                   | 0.0076                                        | 15494                                                           |
| <b>Non-severe hypoglycaemia healthcare costs</b>                                                  |                                                       |                                               |                                                                 |
| Base case values –20%                                                                             | 118                                                   | 0.0065                                        | 18013                                                           |
| Base case values +20%                                                                             | 117                                                   | 0.0065                                        | 17865                                                           |
| <b>Severe hypoglycaemia healthcare costs</b>                                                      |                                                       |                                               |                                                                 |
| Base case values –20%                                                                             | 121                                                   | 0.0065                                        | 18564                                                           |
| Base case values +20%                                                                             | 113                                                   | 0.0065                                        | 17314                                                           |
| Waugh et al. 2010 <sup>5</sup> , inflation adjusted                                               | 133                                                   | 0.0065                                        | 20333                                                           |
| No severe hypo costs                                                                              | 138                                                   | 0.0065                                        | 21062                                                           |
| <b>Insulin doses</b>                                                                              |                                                       |                                               |                                                                 |
| Non-significant rate ratios                                                                       | 117                                                   | 0.0065                                        | 17939                                                           |
| No dose differences                                                                               | 155                                                   | 0.0065                                        | 23674                                                           |
| WHO DDD <sup>6</sup> (40 IU in both arms)                                                         | 63                                                    | 0.0065                                        | 9653                                                            |
| <b>Needles per day</b>                                                                            |                                                       |                                               |                                                                 |
| IGlar U100 two needles per day                                                                    | 82                                                    | 0.0065                                        | 12529                                                           |
| <b>SMBG tests per week</b>                                                                        |                                                       |                                               |                                                                 |
| 1 less SMBG test per week with IDeg                                                               | 99                                                    | 0.0065                                        | 15142                                                           |
| 2 fewer SMBG tests per week with IDeg                                                             | 81                                                    | 0.0065                                        | 12344                                                           |
| 3 fewer SMBG tests per week with IDeg                                                             | 62                                                    | 0.0065                                        | 9547                                                            |
| <b>Hypoglycaemic event disutilities</b>                                                           |                                                       |                                               |                                                                 |
| Evans 2013 <sup>7</sup> (all five countries): non-severe day/night: 0.0041/0.0067, severe: 0.0565 | 117                                                   | 0.0056                                        | 21011                                                           |
| Lauridsen 2014 <sup>8</sup> : diminishing marginal utility approach                               | 117                                                   | 0.0061                                        | 19313                                                           |
| <b>Dosing flexibility utility<sup>a</sup> (not included in base case)</b>                         |                                                       |                                               |                                                                 |
| Boye 2011 <sup>9</sup> : 0.006                                                                    | 117                                                   | 0.0125                                        | 9357                                                            |

|                                                                                                                               |     |        |       |
|-------------------------------------------------------------------------------------------------------------------------------|-----|--------|-------|
| Evans 2013 <sup>10</sup> : 0.013                                                                                              | 117 | 0.0225 | 5206  |
| <b>Work loss costs arising from hypoglycaemia</b>                                                                             |     |        |       |
| Inclusion of work loss costs: Adapted from Brod 2011 <sup>11</sup> and Reviriego 2008 <sup>12</sup> . £37.65, £64.40, £132.08 | 84  | 0.0065 | 12835 |

<sup>a</sup>Able to administer dose at any time of the day; Dominant, improved quality of life at lower cost  
ICER, incremental cost-effectiveness ratio; IU, insulin units; glargine U100, insulin glargine 100 units/mL; SMBG, self-measured blood glucose; T2DM, type 2 diabetes mellitus; QALY, quality-adjusted life-year.

**Supplementary Fig. S1. Probability analysis distribution for ICER for degludec vs. glargine U100 (top) and probability of degludec being cost-effective vs. glargine U100 based on UK willingness-to-pay threshold (bottom): Type 1 diabetes mellitus<sup>a</sup>**

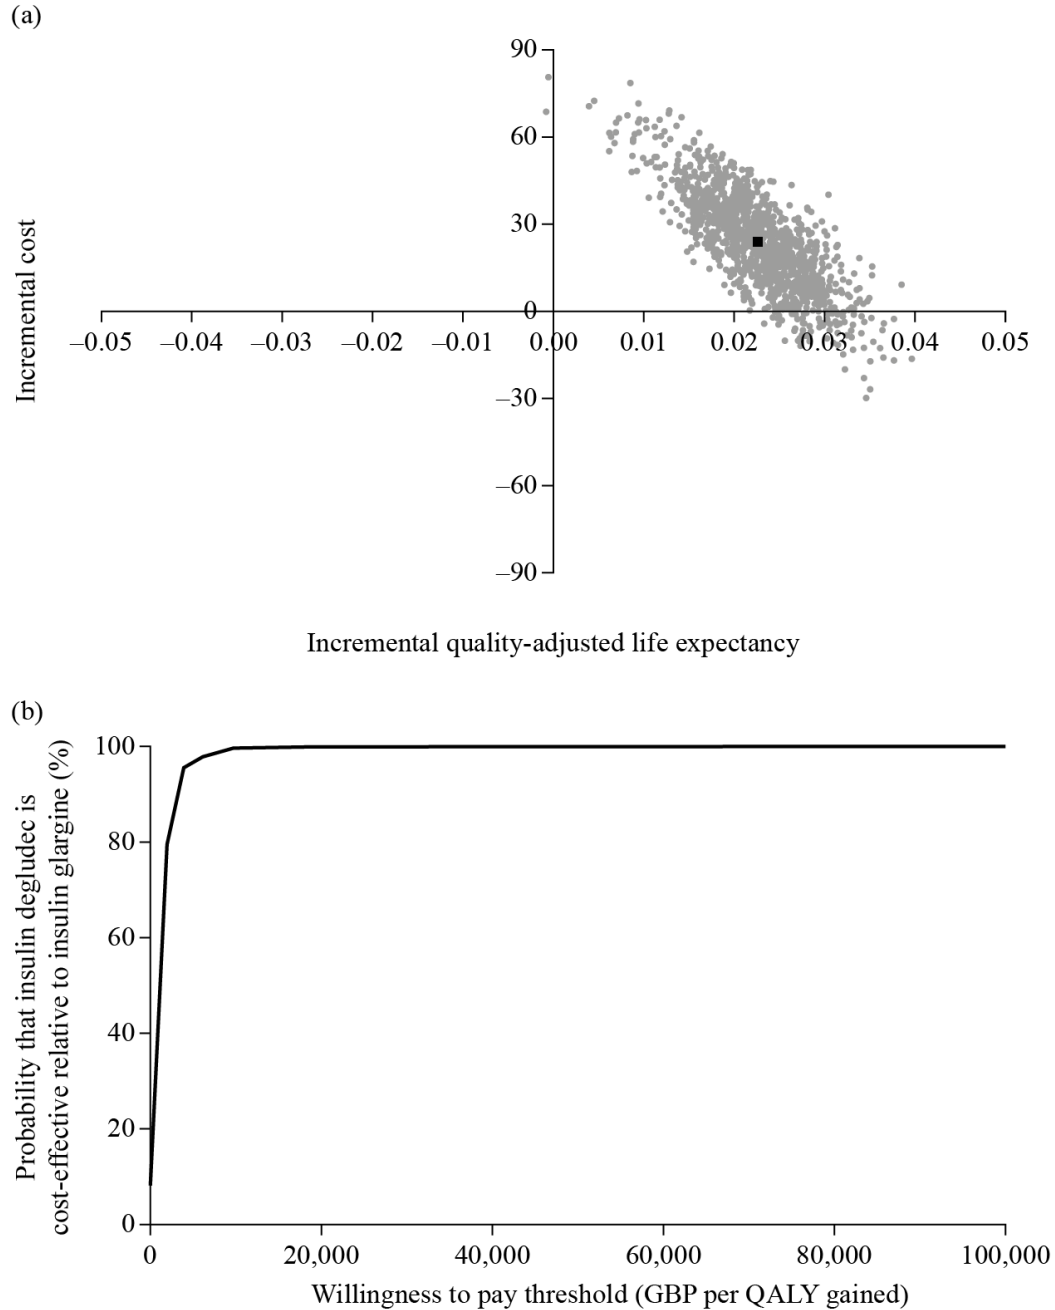

<sup>a</sup>Probabilistic sensitivity analysis based on 1000 iteration where stochastic parameters were varied based on standard errors and relevant distributions. GBP, pounds sterling; ICER, incremental cost-effectiveness ratio; glargine U100, insulin glargine 100 units/mL; QALY, quality-adjusted life-year.

**Supplementary Fig. S2. Probability analysis distribution for ICER for degludec vs. glargine U100 (top) and probability of degludec being cost-effective vs. glargine U100 based on UK willingness-to-pay threshold (bottom): Type 2 diabetes mellitus<sup>a</sup>**

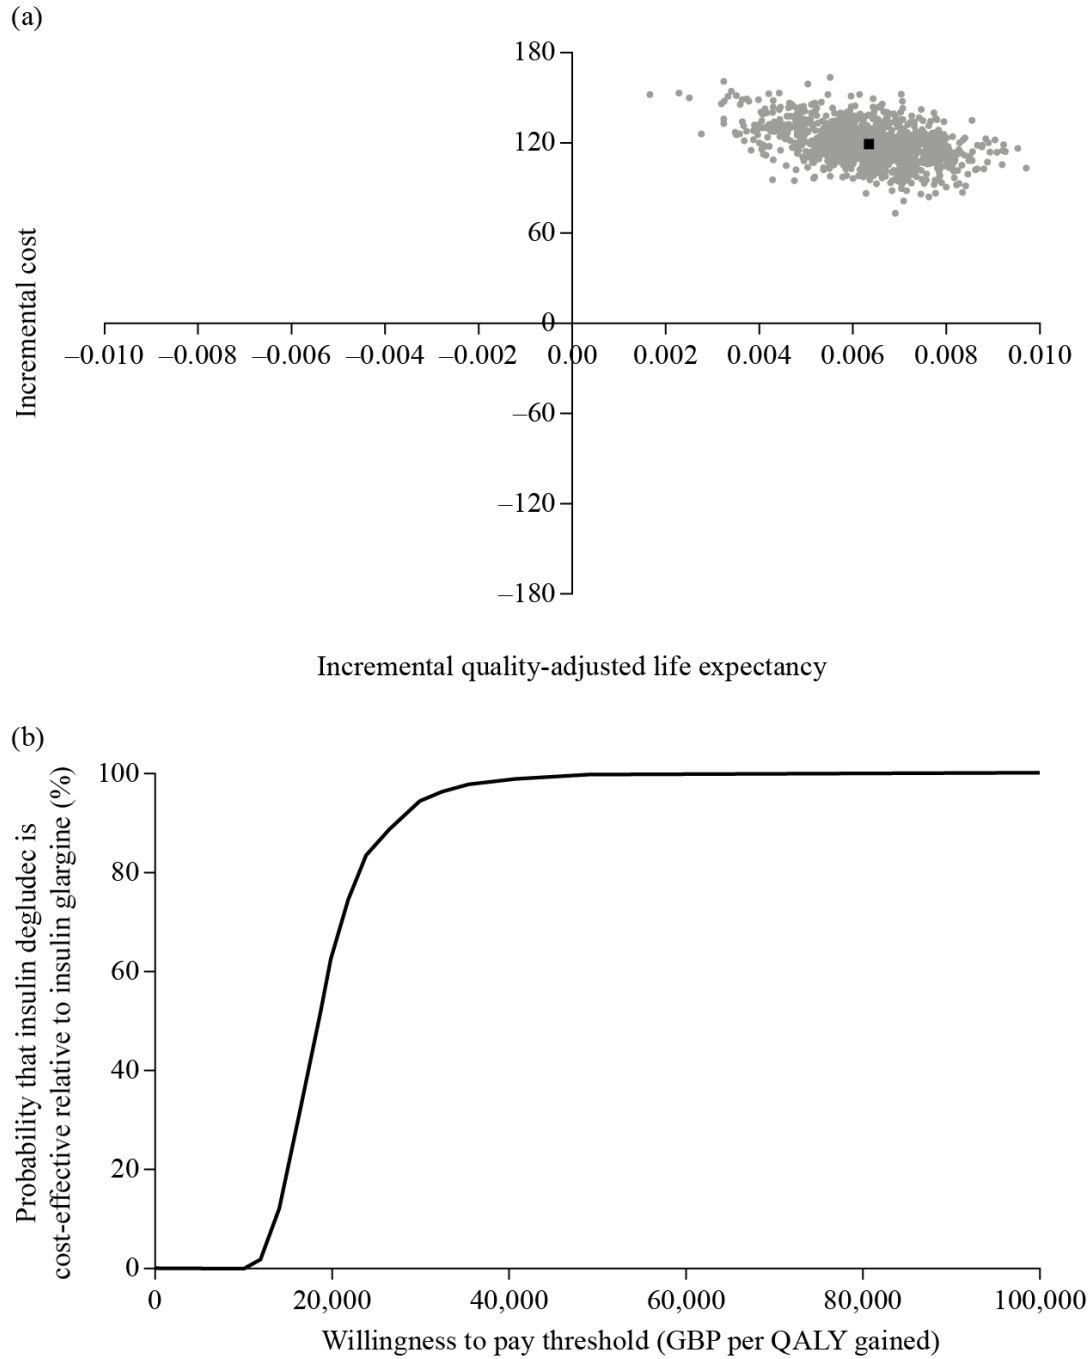

<sup>a</sup>Probabilistic sensitivity analysis based on 1000 iteration where stochastic parameters were varied based on standard errors and relevant distributions. GBP, pounds sterling; ICER, incremental cost-effectiveness ratio; glargine U100, insulin glargine 100 units/mL; QALY, quality-adjusted life-year.

## Supplementary references

- 1 UKHSG. UK Hypoglycaemia Study Group. Risk of hypoglycaemia in types 1 and 2 diabetes: effects of treatment modalities and their duration. *Diabetologia* 2007;50:1140–7.
- 2 Donnelly LA, Morris AD, Frier BM, Ellis JD, Donnan PT, Durrant R *et al*; DARTS/MEMO Collaboration. Frequency and predictors of hypoglycaemia in Type 1 and insulin-treated Type 2 diabetes: a population-based study. *Diabet Med* 2005;22:749–55.
- 3 Dornhorst A, Lüddecke HJ, Sreenan S, Koenen C, Hansen JB, Tsur A *et al*. Safety and efficacy of insulin detemir in clinical practice: 14-week follow-up data from type 1 and type 2 diabetes patients in the PREDICTIVE European cohort. *Int J Clin Pract* 2007;61:523–8.
- 4 Östenson CG, Geelhoed-Duijvestijn P, Lahtela J, Weitgasser R, Markert Jensen M, Pedersen-Bjergaard U. Self-reported non-severe hypoglycaemic events in Europe. *Diabet Med* 2014;31:92–101.
- 5 Waugh N, Cummins E, Royle P, Clar C, Marien M, Richter B *et al*. Newer agents for blood glucose control in type 2 diabetes: systematic review and economic evaluation. *Health Technol Assess* 2010;14:1–248.
- 6 WHO DDD. WHO Collaborating Centre for Drug Statistics Methodology. Available at [www.whooc.no](http://www.whooc.no). Last accessed 28 June 2017.
- 7 Evans M, Khunti K, Mamdani M, Galbo-Jørgensen CB, Gundgaard J, Bøgelund M *et al*. Health-related quality of life associated with daytime and nocturnal hypoglycaemic events: a time trade-off survey in five countries. *Health Qual Life Outcomes* 2013;11:90.
- 8 Lauridsen JT, Lønborg J, Gundgaard J, Jensen HH. Diminishing marginal disutility of hypoglycaemic events: results from a time trade-off survey in five countries. *Qual Life Res* 2014;23:2645–50.
- 9 Boye KS, Matza LS, Walter KN, Van Brunt K, Palsgrove AC, Tynan A. Utilities and disutilities for attributes of injectable treatments for type 2 diabetes. *Eur J Health Econ* 2011;12:219–30.
- 10 Evans M, Jensen HH, Bogelund M, Gundgaard J, Chubb B, Khunti K. Flexible insulin dosing improves health-related quality-of-life (HRQoL): a time trade-off survey. *J Med Econ* 2013;16:1357–65.
- 11 Brod M, Christensen T, Thomsen TL, Bushnell DM. The impact of non-severe hypoglycemic events on work productivity and diabetes management. *Value Health* 2011;14:665–71.
- 12 Reviriego J, Gomis R, Marañés JP, Ricart W, Hudson P, Sacristán JA. Cost of severe hypoglycaemia in patients with type 1 diabetes in Spain and the cost-effectiveness of insulin lispro compared with regular human insulin in preventing severe hypoglycaemia. *Int J Clin Pract* 2008;62:1026–32.
